# Supplementary material
Source: publisher site journal article supplement (https://www.dovepress.com/get_supplementary_file.php?f=439873.docx)
Supplement: Supplementary file 1 [file get_supplementary_file.php]

Supplementary Table 1 Herbal compositions of ANPCD.

| Latin Name | English Name | Chinese  Name | Part Used | Quantity  (Dry Weight) |
| --- | --- | --- | --- | --- |
| *Os Draconis* | Mastodi Ossis Fossilia | LongGu | Fossil | 30g |
| *Ostrea gigas* Thunberg | Ostreae Concha | MuLi | Shell | 30g |
| *Cyathula officinalis* K.C.Kuan | Cyathulae Radix | Chuan NiuXi | Dried roots | 15g |
| *Tribulus terrestris* L. | Tribuli Fructus | BaiJiLi | Dried ripe fruit | 12g |
| *Uncaria*  *rhynchophylla*  (Miq.) Miq. ex Havil. | Uncariae Ramulus Cum Uncis | GouTeng | Dried hooked stem and branch | 12g |
| *Alisma*  *plantago-aquatica*L. | Alismatis Rhizoma | ZeXie | Dried tuber | 12g |
| *Paeonia*  *lactiflora*Pall. | Paeoniae Radix Alba Cruda | BaiShao | Dried roots | 12g |
| *Gardenia jasminoides* J.Ellis | Gardeniae Fructus | Zhizi | Dried ripe fruit | 12g |
| *Paeonia ×*  *suffruticosa*  Andr. | Moutan Cortex | MuDanPi | Dried roots bark | 12g |
| *Scutellaria baicalensis* Georgi | Scutellariae Radix | HuangQin | Dried roots | 12g |
| *Rheum palmatum* L. | Rhei Radix et Rhubarb | DaHuang | Dried roots and rhizomes | 9g |
| *Glycyrrhiza uralensis* Fisch . | Glycyrrhizea Radix | GanCao | Dried roots and rhizomes | 6g |

Supplementary Table 2 Modified Neurological Severity Score.

|  | Points |
| --- | --- |
| Motor tests | 6 |
| Raising rat by the tail | 3 |
| Flexion of forelimb | 1 |
| Flexion of hindlimb | 1 |
| Head moved > 10° to vertical axis within 30 s | 1 |
| Placing rat on the floor (normal = 0; maximum = 3) | 3 |
| Normal walk | 0 |
| Inability to walk straight | 1 |
| Circling toward the paretic side | 2 |
| Fall down to the paretic side | 3 |
| Sensory tests | 2 |
| Placing test (visual and tactile test) | 1 |
| Proprioceptive test (deep sensation, pushing the paw against the table edge to stimulate limb muscles) | 1 |
| Beam balance tests (normal = 0; maximum = 6) | 6 |
| Balances with steady posture | 0 |
| Grasps side of beam | 1 |
| Hugs the beam and one limb falls down from the beam | 2 |
| Hugs the beam and two limbs fall down from the beam, or spins on beam  (> 60 s) | 3 |
| Attempts to balance on the beam but falls off (> 40 s) | 4 |
| Attempts to balance on the beam but falls off (> 20 s) | 5 |
| Falls off: No attempt to balance or hang on to the beam (< 20 s) | 6 |
| Reflexes absent and abnormal movements | 4 |
| Pinna reflex (head shake when touching the auditory meatus) | 1 |
| Corneal reflex (eye blink when lightly touching the cornea with cotton) | 1 |
| Startle reflex (motor response to a brief noise from snapping a clipboard  paper) | 1 |
| Seizures, myoclonus, myodystony | 1 |
| Maximum points | 18 |

One point is awarded for the inability to perform the tasks or for the lack of a tested reflex; 13 to 18 indicates severe injury; 7 to 12, moderate injury; 1 to 6, mild injury.

Supplementary Table 3 The active compounds of ANPCD.

| ID | Molecule | Drug |
| --- | --- | --- |
| MOL000359 | sitosterol | BaiJiLi |
| MOL000483 | (Z)-3-(4-hydroxy-3-methoxy-phenyl)-N-[2-(4hydroxyphenyl)ethyl]acrylamide | BaiJiLi |
| MOL008559 | (2aR,2'R,4R,6aR,6bS,8aS,8bR,11aS,12aR,12bR)-4-((S)-2-(2,6-dimethylphenyl)propoxy)-5',5',6a,8a-tetramethyl-8-methylenedocosahydro-1H-spiro[pentaleno[2,1-a]phenanthrene-10,2'-pyran] | BaiJiLi |
| MOL008563 | (3R,8S,9S,10R,13R,14R,17S)-17-((2S,5R)-5-ethyl-6-methylheptan-2-yl)-3-hydroxy-10,13-dimethyl-3,4,8,9,10,11,12,13,14,15,16,17-dodecahydro-1H-cyclopenta[a]phenanthren-7(2H)-one | BaiJiLi |
| MOL008567 | (3R,7R,8S,9S,10S,13R,14S,17R)-17-((2R,5S)-5-ethyl-6-methylheptan-2-yl)-3,10-dimethyl-2,3,4,7,8,9,10,11,12,13,14,15,16,17-tetradecahydro-1H-cyclopenta[a]phenanthren-7-ol | BaiJiLi |
| MOL008569 | beta-sitosterol-beta-D-glucopyranoside | BaiJiLi |
| MOL008593 | (2aR,5S,6aS,6bS,8aS,8bS,11aS,12aR,12bR)-10-isopentyl-6a,8a,9-trimethyl-2,2a,3,4,5,6,6a,6b,7,8,8a,8b,11a,12,12a,12b-hexadecahydro-1H-naphtho[2',1':4,5]indeno[2,1-b]furan-5-ol | BaiJiLi |
| MOL000358 | beta-sitosterol | GouTeng |
| MOL000359 | sitosterol | GouTeng |
| MOL008456 | (3E,4R)-4-(1,3-benzodioxol-5-ylmethyl)-3-[(3,4,5-trimethoxyphenyl)methylidene]oxolan-2-one | GouTeng |
| MOL008457 | Tetrahydroalstonine | GouTeng |
| MOL008458 | Angustidine | GouTeng |
| MOL008460 | geissoschizinc acid | GouTeng |
| MOL008463 | SMR000232338 | GouTeng |
| MOL008465 | (E)-16,17-Didehydro-17-methoxy-17,18-seco-3-beta-yohimban-16-carboxylic acid methyl ester | GouTeng |
| MOL008467 | Rhynchophylline A | GouTeng |
| MOL008468 | methyl (E)-2-[(2S,3Z,12bS)-3-ethylidene-2,4,6,7,12,12b-hexahydro-1H-indolo[3,2-h]quinolizin-2-yl]-3-methoxyprop-2-enoate | GouTeng |
| MOL008469 | Rhynchophylline | GouTeng |
| MOL008470 | SMR000232333 | GouTeng |
| MOL008471 | Isorhyncophylline | GouTeng |
| MOL008472 | hirsutasideA | GouTeng |
| MOL008473 | (E)-2-[(3S,6'S,7'S,8'aS)-6'-ethyl-2-keto-spiro[indoline-3,1'-indolizidine]-7'-yl]-3-methoxy-acrylic acid methyl ester | GouTeng |
| MOL008474 | (E)-2-[(3R,6'S,7'S,8'aS)-6'-ethyl-2-keto-spiro[indoline-3,1'-indolizidine]-7'-yl]-3-methoxy-acrylic acid methyl ester | GouTeng |
| MOL008475 | Mitraphyllic acid | GouTeng |
| MOL008476 | hirsutasideB | GouTeng |
| MOL008477 | corynoxeine | GouTeng |
| MOL008478 | methyl (E)-2-[(2S,3R,12bS)-3-vinyl-1,2,3,4,6,7,12,12b-octahydroindolo[3,2-h]quinolizin-2-yl]-3-methoxy-prop-2-enoate | GouTeng |
| MOL008482 | (2S,12bR)-methyl 2-((E)-1-oxobut-2-en-2-yl)-1,2,6,7,12,12b-hexahydroindolo[2,3-a]quinolizine-3-carboxylate | GouTeng |
| MOL008484 | vincoside lactam_qt | GouTeng |
| MOL008487 | hirsutine | GouTeng |
| MOL008488 | yohimbine | GouTeng |
| MOL008489 | delta(sup 18)-Hirsutine | GouTeng |
| MOL008490 | isocorynantheic acid | GouTeng |
| MOL008635 | coryincine | GouTeng |
| MOL012286 | Betavulgarin | ChuanNiuXi |
| MOL000358 | beta-sitosterol | ChuanNiuXi |
| MOL001689 | acacetin | HuangQin |
| MOL000173 | wogonin | HuangQin |
| MOL000228 | (2R)-7-hydroxy-5-methoxy-2-phenylchroman-4-one | HuangQin |
| MOL002714 | baicalein | HuangQin |
| MOL002908 | 5,8,2'-Trihydroxy-7-methoxyflavone | HuangQin |
| MOL002913 | Dihydrobaicalin_qt | HuangQin |
| MOL002915 | Salvigenin | HuangQin |
| MOL002917 | 5,2',6'-Trihydroxy-7,8-dimethoxyflavone | HuangQin |
| MOL002926 | dihydrooroxylin A | HuangQin |
| MOL002927 | Skullcapflavone II | HuangQin |
| MOL002928 | oroxylin a | HuangQin |
| MOL002932 | Panicolin | HuangQin |
| MOL002934 | NEOBAICALEIN | HuangQin |
| MOL002937 | DIHYDROOROXYLIN | HuangQin |
| MOL000358 | beta-sitosterol | GouTeng |
| MOL000359 | sitosterol | BaiJiLi |
| MOL000525 | Norwogonin | HuangQin |
| MOL000552 | 5,2'-Dihydroxy-6,7,8-trimethoxyflavone | HuangQin |
| MOL000449 | Stigmasterol | HuangQin |
| MOL001458 | coptisine | HuangQin |
| MOL001490 | bis[(2S)-2-ethylhexyl] benzene-1,2-dicarboxylate | HuangQin |
| MOL001506 | Supraene | HuangQin |
| MOL002879 | Diop | HuangQin |
| MOL002897 | epiberberine | HuangQin |
| MOL008206 | Moslosooflavone | HuangQin |
| MOL010415 | 11,13-Eicosadienoic acid, methyl ester | HuangQin |
| MOL012266 | rivularin | HuangQin |
| MOL000211 | Mairin | BaiShao |
| MOL000358 | beta-sitosterol | BaiShao |
| MOL000359 | sitosterol | BaiShao |
| MOL002235 | EUPATIN | DaHuang |
| MOL002251 | Mutatochrome | DaHuang |
| MOL002281 | Toralactone | DaHuang |
| MOL002297 | Daucosterol_qt | DaHuang |
| MOL000358 | beta-sitosterol | DaHuang |
| MOL000211 | Mairin | MuDanPi |
| MOL000359 | sitosterol | MuDanPi |
| MOL007369 | 4-O-methylpaeoniflorin_qt | MuDanPi |
| MOL001663 | (4aS,6aR,6aS,6bR,8aR,10R,12aR,14bS)-10-hydroxy-2,2,6a,6b,9,9,12a-heptamethyl-1,3,4,5,6,6a,7,8,8a,10,11,12,13,14b-tetradecahydropicene-4a-carboxylic acid | Zhizi |
| MOL001941 | Ammidin | Zhizi |
| MOL004561 | Sudan III | Zhizi |
| MOL000358 | beta-sitosterol | Zhizi |
| MOL000449 | Stigmasterol | Zhizi |
| MOL001494 | Mandenol | Zhizi |
| MOL001506 | Supraene | Zhizi |
| MOL001942 | isoimperatorin | Zhizi |
| MOL002883 | Ethyl oleate (NF) | Zhizi |
| MOL003095 | 5-hydroxy-7-methoxy-2-(3,4,5-trimethoxyphenyl)chromone | Zhizi |
| MOL000359 | sitosterol | ZeXie |
| MOL000831 | Alisol B monoacetate | ZeXie |
| MOL000862 | [(1S,3R)-1-[(2R)-3,3-dimethyloxiran-2-yl]-3-[(5R,8S,9S,10S,11S,14R)-11-hydroxy-4,4,8,10,14-pentamethyl-3-oxo-1,2,5,6,7,9,11,12,15,16-decahydrocyclopenta[a]phenanthren-17-yl]butyl] acetate | ZeXie |
| MOL001484 | Inermine | GanCao |
| MOL001792 | DFV | GanCao |
| MOL000211 | Mairin | GanCao |
| MOL002311 | Glycyrol | GanCao |
| MOL000239 | Jaranol | GanCao |
| MOL002565 | Medicarpin | GanCao |
| MOL000359 | sitosterol | GanCao |
| MOL003656 | Lupiwighteone | GanCao |
| MOL003896 | 7-Methoxy-2-methyl isoflavone | GanCao |
| MOL000392 | formononetin | GanCao |
| MOL004805 | (2S)-2-[4-hydroxy-3-(3-methylbut-2-enyl)phenyl]-8,8-dimethyl-2,3-dihydropyrano[2,3-f]chromen-4-one | GanCao |
| MOL004806 | euchrenone | GanCao |
| MOL004808 | glyasperin B | GanCao |
| MOL004810 | glyasperin F | GanCao |
| MOL004811 | Glyasperin C | GanCao |
| MOL004814 | Isotrifoliol | GanCao |
| MOL004815 | (E)-1-(2,4-dihydroxyphenyl)-3-(2,2-dimethylchromen-6-yl)prop-2-en-1-one | GanCao |
| MOL004820 | kanzonols W | GanCao |
| MOL004828 | Glepidotin A | GanCao |
| MOL004829 | Glepidotin B | GanCao |
| MOL004833 | Phaseolinisoflavan | GanCao |
| MOL004835 | Glypallichalcone | GanCao |
| MOL004838 | 8-(6-hydroxy-2-benzofuranyl)-2,2-dimethyl-5-chromenol | GanCao |
| MOL004848 | licochalcone G | GanCao |
| MOL004849 | 3-(2,4-dihydroxyphenyl)-8-(1,1-dimethylprop-2-enyl)-7-hydroxy-5-methoxy-coumarin | GanCao |
| MOL004855 | Licoricone | GanCao |
| MOL004856 | Gancaonin A | GanCao |
| MOL004857 | Gancaonin B | GanCao |
| MOL004863 | 3-(3,4-dihydroxyphenyl)-5,7-dihydroxy-8-(3-methylbut-2-enyl)chromone | GanCao |
| MOL004864 | 5,7-dihydroxy-3-(4-methoxyphenyl)-8-(3-methylbut-2-enyl)chromone | GanCao |
| MOL004866 | 2-(3,4-dihydroxyphenyl)-5,7-dihydroxy-6-(3-methylbut-2-enyl)chromone | GanCao |
| MOL004879 | Glycyrin | GanCao |
| MOL004882 | Licocoumarone | GanCao |
| MOL004883 | Licoisoflavone | GanCao |
| MOL004884 | Licoisoflavone B | GanCao |
| MOL004885 | licoisoflavanone | GanCao |
| MOL004891 | shinpterocarpin | GanCao |
| MOL004907 | Glyzaglabrin | GanCao |
| MOL004908 | Glabridin | GanCao |
| MOL004910 | Glabranin | GanCao |
| MOL004911 | Glabrene | GanCao |
| MOL004912 | Glabrone | GanCao |
| MOL004913 | 1,3-dihydroxy-9-methoxy-6-benzofurano[3,2-c]chromenone | GanCao |
| MOL004915 | Eurycarpin A | GanCao |
| MOL004941 | (2R)-7-hydroxy-2-(4-hydroxyphenyl)chroman-4-one | GanCao |
| MOL004945 | (2S)-7-hydroxy-2-(4-hydroxyphenyl)-8-(3-methylbut-2-enyl)chroman-4-one | GanCao |
| MOL004948 | Isoglycyrol | GanCao |
| MOL004957 | HMO | GanCao |
| MOL004959 | 1-Methoxyphaseollidin | GanCao |
| MOL004966 | 3'-Hydroxy-4'-O-Methylglabridin | GanCao |
| MOL000497 | licochalcone a | GanCao |
| MOL004974 | 3'-Methoxyglabridin | GanCao |
| MOL004978 | 2-[(3R)-8,8-dimethyl-3,4-dihydro-2H-pyrano[6,5-f]chromen-3-yl]-5-methoxyphenol | GanCao |
| MOL004980 | Inflacoumarin A | GanCao |
| MOL004985 | icos-5-enoic acid | GanCao |
| MOL004988 | Kanzonol F | GanCao |
| MOL004989 | 6-prenylated eriodictyol | GanCao |
| MOL004991 | 7-Acetoxy-2-methylisoflavone | GanCao |
| MOL004996 | gadelaidic acid | GanCao |
| MOL000500 | Vestitol | GanCao |
| MOL005000 | Gancaonin G | GanCao |
| MOL005001 | Gancaonin H | GanCao |
| MOL005003 | Licoagrocarpin | GanCao |
| MOL005007 | Glyasperins M | GanCao |
| MOL005012 | Licoagroisoflavone | GanCao |
| MOL005016 | Odoratin | GanCao |
| MOL005017 | Phaseol | GanCao |
| MOL005018 | Xambioona | GanCao |
| MOL005020 | dehydroglyasperins C | GanCao |
| DML001 | taurine | MuLi |
| DML002 | phenylalanine | MuLi |
| DML003 | Calcium carbonate | MuLi |
| DML004 | Calcium phosphate | MuLi |
| DML005 | Valine | MuLi |
| DML006 | Threonine | MuLi |
| DML007 | Leucine | MuLi |
| DML008 | glutamic acid | MuLi |
| DML009 | Glycine | MuLi |
| DML010 | Proline | MuLi |
| DML011 | DL-Methionine | MuLi |
| DML012 | Isoleucine | MuLi |
| DML013 | lysine | MuLi |
| DML014 | Aspartic acid | MuLi |
| DML015 | Cystine | MuLi |
| DLG001 | Glycine | LongGu |
| DLG002 | Cystine | LongGu |
| DLG003 | Methionine | LongGu |
| DLG004 | Isoleucine | LongGu |
| DLG005 | Leucine | LongGu |
| DLG006 | Phenylalanine | LongGu |
| DLG007 | Tyrosine | LongGu |
| DLG008 | Calcium carbonate | LongGu |
| DLG009 | Tricalcium phosphate | LongGu |
| DLG010 | Phosphorus pentoxide | LongGu |
| DLG011 | iron(II) oxide | LongGu |
| DLG012 | Magnesium oxide | LongGu |


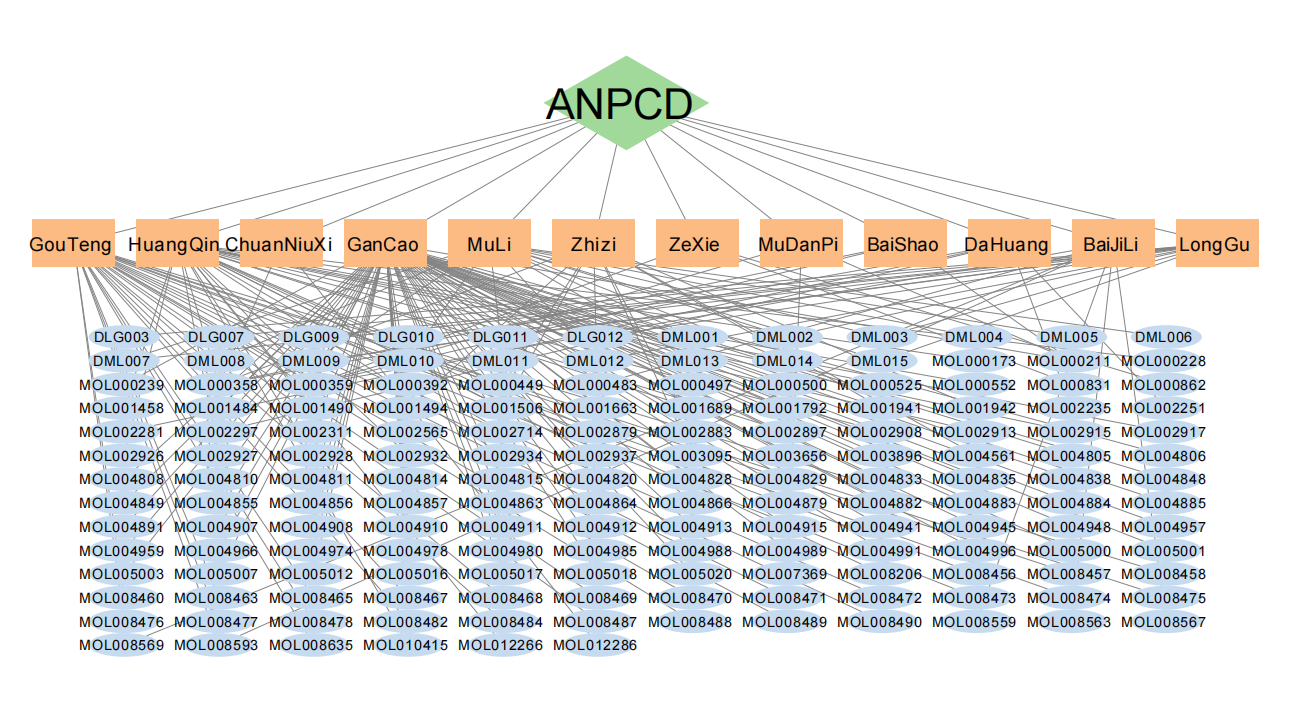


**Supplementary Figure 1:** The regulation network diagram of the 12 herbs of ANPCD and their active components. The orange rectangle represents herbs of ANPCD and the blue ellipse represents the active components.
